# Supplementary material for: Differences in DNA Repair Capacity, Cell Death and Transcriptional Response after Irradiation between a Radiosensitive and a Radioresistant Cell Line
Source: PubMed Central journal article supplement (PMC4887990; doi:10.1038/srep27043), 2016-06-01
Supplement: srep27043-s1.pdf [file srep27043-s1.pdf]

## SUPPLEMENTARY INFORMATION AND DATASET LEGENDS

**TITLE:** Differences in DNA Repair Capacity, Cell Death and Transcriptional Response after Irradiation between a Radiosensitive and a Radioresistant Cell Line

**AUTHORS LIST:** Mireia Borràs-Fresneda, Joan-Francesc Barquinero, Maria Gomolka, Sabine Hornhardt, Ute Rössler, Gemma Armengol and Leonardo Barrios

## SUPPLEMENTARY INFORMATION

**Supplementary Table S1. Chromosome analysis by FISH with pancentromeric and pantelomeric probes 24 h after 2 Gy irradiation**

|                                                                      | Cell line               |                       |
|----------------------------------------------------------------------|-------------------------|-----------------------|
|                                                                      | 4060 (RS)               | 20037 (RR)            |
| <b><i>Incomplete chromosome elements (ICE)</i></b>                   |                         |                       |
| chr (+/-)                                                            | 69                      | 45                    |
| chr (-/-)                                                            | 11                      | 8                     |
| ace (+/-)                                                            | 95                      | 55                    |
| dic (+/-)                                                            | 0                       | 0                     |
| dic (-/-)                                                            | 0                       | 0                     |
| <b>Total ICE (frequency <math>\pm</math> SE)</b>                     | 175 (1.75 $\pm$ 0.22) * | 108 (1.08 $\pm$ 0.17) |
| <b><i>Complete chromosome elements (CCE)</i></b>                     |                         |                       |
| dic (+/+)                                                            | 30                      | 39                    |
| tri (+/+)                                                            | 2                       | 0                     |
| R                                                                    | 1                       | 0                     |
| ace (+/+)                                                            | 33                      | 42                    |
| <b>Total CCE (frequency <math>\pm</math> SE)</b>                     | 66 (0.66 $\pm$ 0.14)    | 81 (0.81 $\pm$ 0.12)  |
| <b><i>Interstitial deletions (frequency <math>\pm</math> SE)</i></b> | 14 (0.14 $\pm$ 0.04)    | 7 (0.07 $\pm$ 0.03)   |

\*  $p < 0.05$ , significant differences obtained with Mann-Whitney test.

**Supplementary Table S2. Differentially up- and down-regulated genes after 4 and 24 h and 14 days after 2 Gy irradiation**

|                   | Post-irradiation<br>time | DE genes <sup>a</sup> | Up-regulated<br>genes | Down-regulated<br>genes |
|-------------------|--------------------------|-----------------------|-----------------------|-------------------------|
| <b>4060 (RS)</b>  | 4 h                      | 96                    | 78                    | 18                      |
|                   | 24 h                     | 58                    | 53                    | 5                       |
|                   | 14 days                  | 0                     | 0                     | 0                       |
| <b>20037 (RR)</b> | 4 h                      | 36                    | 33                    | 3                       |
|                   | 24 h                     | 7                     | 7                     | 0                       |
|                   | 14 days                  | 0                     | 0                     | 0                       |

<sup>a</sup>After applying a 0.05 FDR cut-off.

## **SUPPLEMENTARY DATASETS**

**Supplementary Dataset S1. Complete differential expression results for the RS cell line 4 h after 2 Gy irradiation.** Genes are ordered by their FDR values.

**Supplementary Dataset S2. Complete differential expression results for the RR cell line 4 h after 2 Gy irradiation.** Genes are ordered by their FDR values.

**Supplementary Dataset S3. Complete differential expression results for the RS cell line 24 h after 2 Gy irradiation.** Genes are ordered by their FDR values.

**Supplementary Dataset S4. Complete differential expression results for the RR cell line 24 h after 2 Gy irradiation.** Genes are ordered by their FDR values.

**Supplementary Dataset S5. Complete differential expression results for the RS cell line 14 days after 2 Gy irradiation.** Genes are ordered by their FDR values.

**Supplementary Dataset S6. Complete differential expression results for the RR cell line 14 days after 2 Gy irradiation.** Genes are ordered by their FDR values.

**Supplementary Dataset S7. Functional analysis of differential expression results with GOseq for the RS cell line 4 and 24 h after 2 Gy irradiation.** GO categories are ordered by the p value of the overrepresented ones.
